# Supplementary material
Source: PubMed Central journal article supplement (PMC3619242)
Supplement: cdd20134x1.pdf [file cdd20134x1.pdf]

**Figure S1. Analysis of genomic and cDNA sequences of the targeted regions in WT-KI and indicated mutant KI cells, with WT and corresponding mutant sequences underlined.** (A) WT-KI cells; (B) K21E-KI cells; (C) D33A-KI cells; (D) D68R-KI cells; (E) L70A/D71A-KI cells; (F) S184V-KI cells.

**Figure S2. Analysis of apoptosis in knock-in cells by annexin V/propidium iodide (PI) staining.** HCT116 cells with indicated *BAX* genotypes were treated with 120  $\mu$ M sulindac for 36 hours, or 10 ng/ml TRAIL for 24 hours. After treatment, cells were stained with annexin V/PI and analyzed by flow cytometry. Cells in the two right quadrants represent annexin V-positive apoptotic cells, and their percentages are indicated.

**Figure S3. Expression of Bcl-2 family members in cells with or without sulindac or TRAIL treatment.** (A) HCT116 cells were treated with 120  $\mu$ M sulindac or 10 ng/ml TRAIL for 24 hours. BH3-only Bcl-2 family members, including Bim, PUMA, Bid and Bad, were analyzed by Western blotting. (B) HCT116 cells transfected with GFP-Bax for 24 hours, along with untreated HCT116, WT-KI and MEF cells, were analyzed for Bax expression by Western blotting. (C) Whole cell lysate, cytosolic and mitochondrial fractions isolated from HCT116 cells treated with 120  $\mu$ M sulindac for 36 hours or 10 ng/ml TRAIL for 24 hours were probed for Bak expression. Cox IV and  $\beta$ -actin were used as control for loading and fractionation.

**Figure S4. Interactions of WT and mutant Bax with other Bcl-2 family members in cells lysed with different detergents.** *BAX*-KO cells were co-transfected with GFP-tagged WT Bax and HA-tagged Bim, HA-tagged PUMA, or V5-tagged Bcl-X<sub>L</sub>. Cells were lysed with a buffer containing either 0.5% NP-40 or 0.5% CHAPS as detergent. IP was performed with anti-GFP antibody to pull down Bax. Bax bound to the co-transfected proteins and the pull-down efficiency were analyzed by Western blotting of GFP and HA/V5, respectively.

**Figure S5. Suppression of sulindac-induced apoptosis by Bcl-X<sub>L</sub>.** (A) Parental and indicated Bax knock-in HCT116 cells were transfected with V5-tagged Bcl-X<sub>L</sub> and treated with 120 μM sulindac for 36 hours. Expression of the transfected Bcl-X<sub>L</sub> was analyzed by Western blotting. (B) Apoptosis in cells treated as in (A) was determined by nuclear staining. \*\*\*:  $P < 0.001$ .

**Figure S6. Indomethacin-induced apoptosis in WT-KI and L70A/D71A-KI cells.** Parental and indicated Bax knock-in HCT116 cells treated with 500 μM indomethacin were analyzed for apoptosis induction. (A) Apoptosis in cells treated for 48 hours was analyzed by counting cells with condensed and fragmented nuclei after nuclear staining with Hoechst 33258. (B) Apoptosis in cells treated for 36 hours was analyzed by annexin V/PI staining and flow cytometry. Cells in the two right quadrants represent annexin V-positive apoptotic cells.

Figure S1

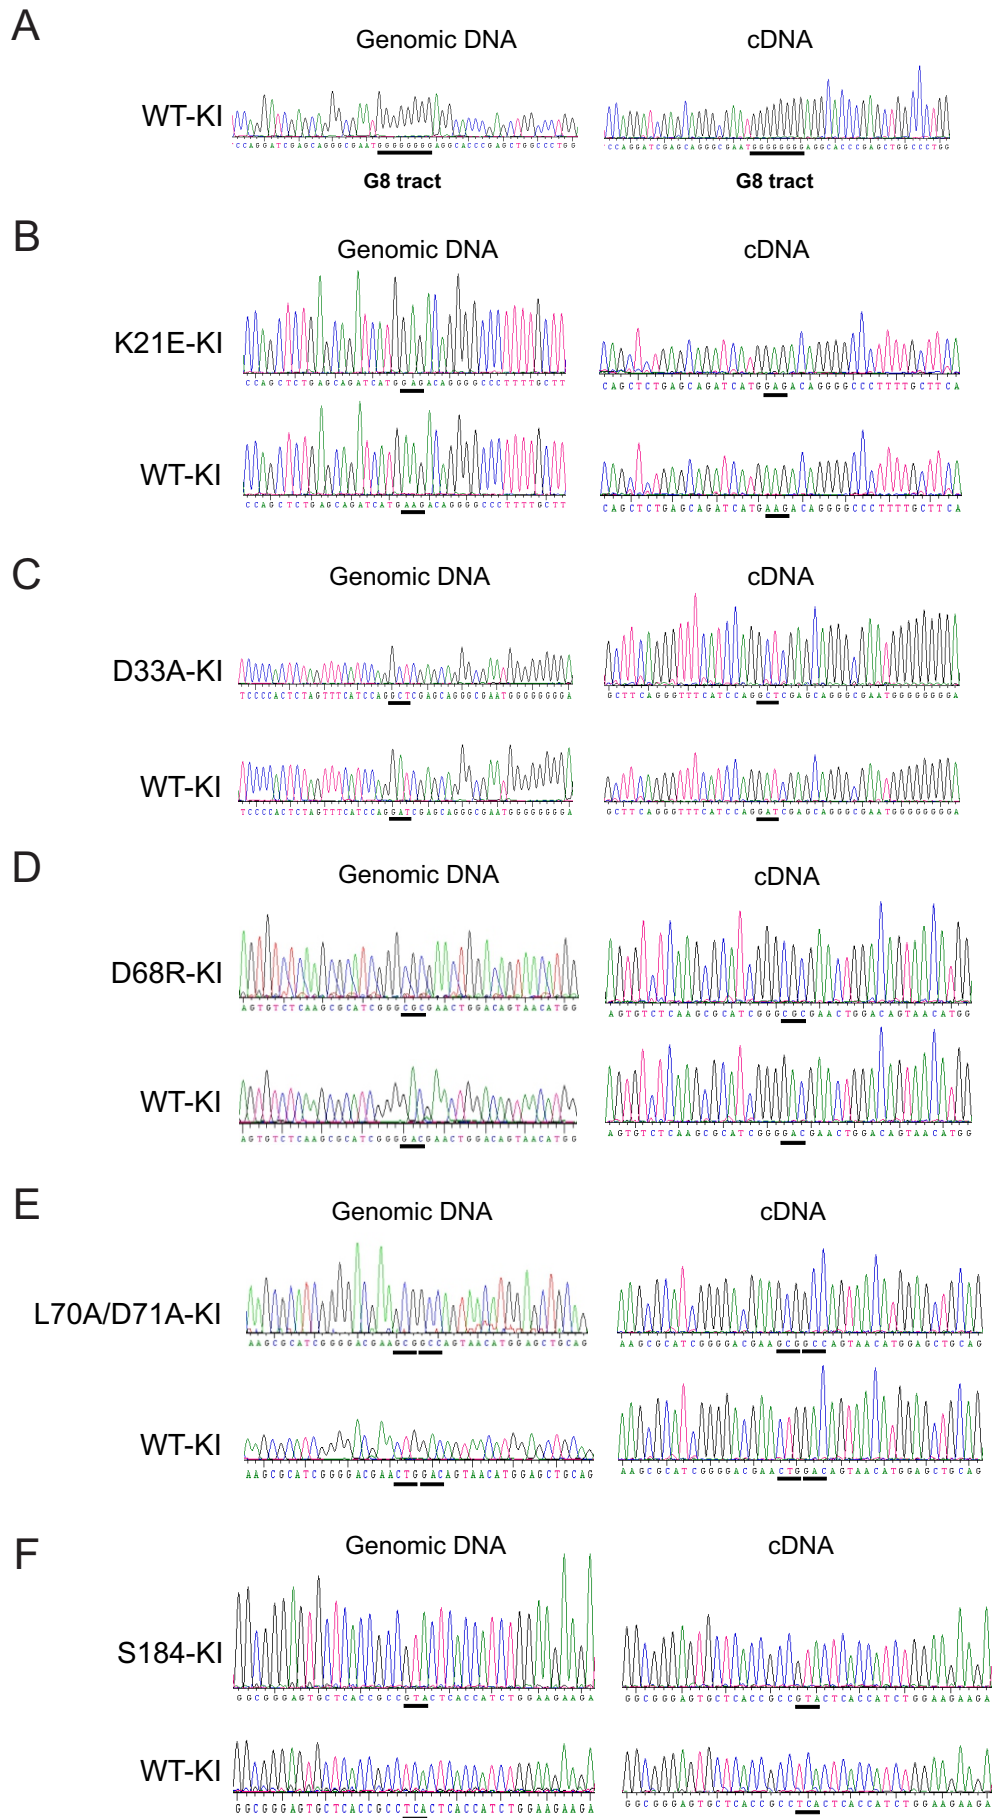

Figure S2

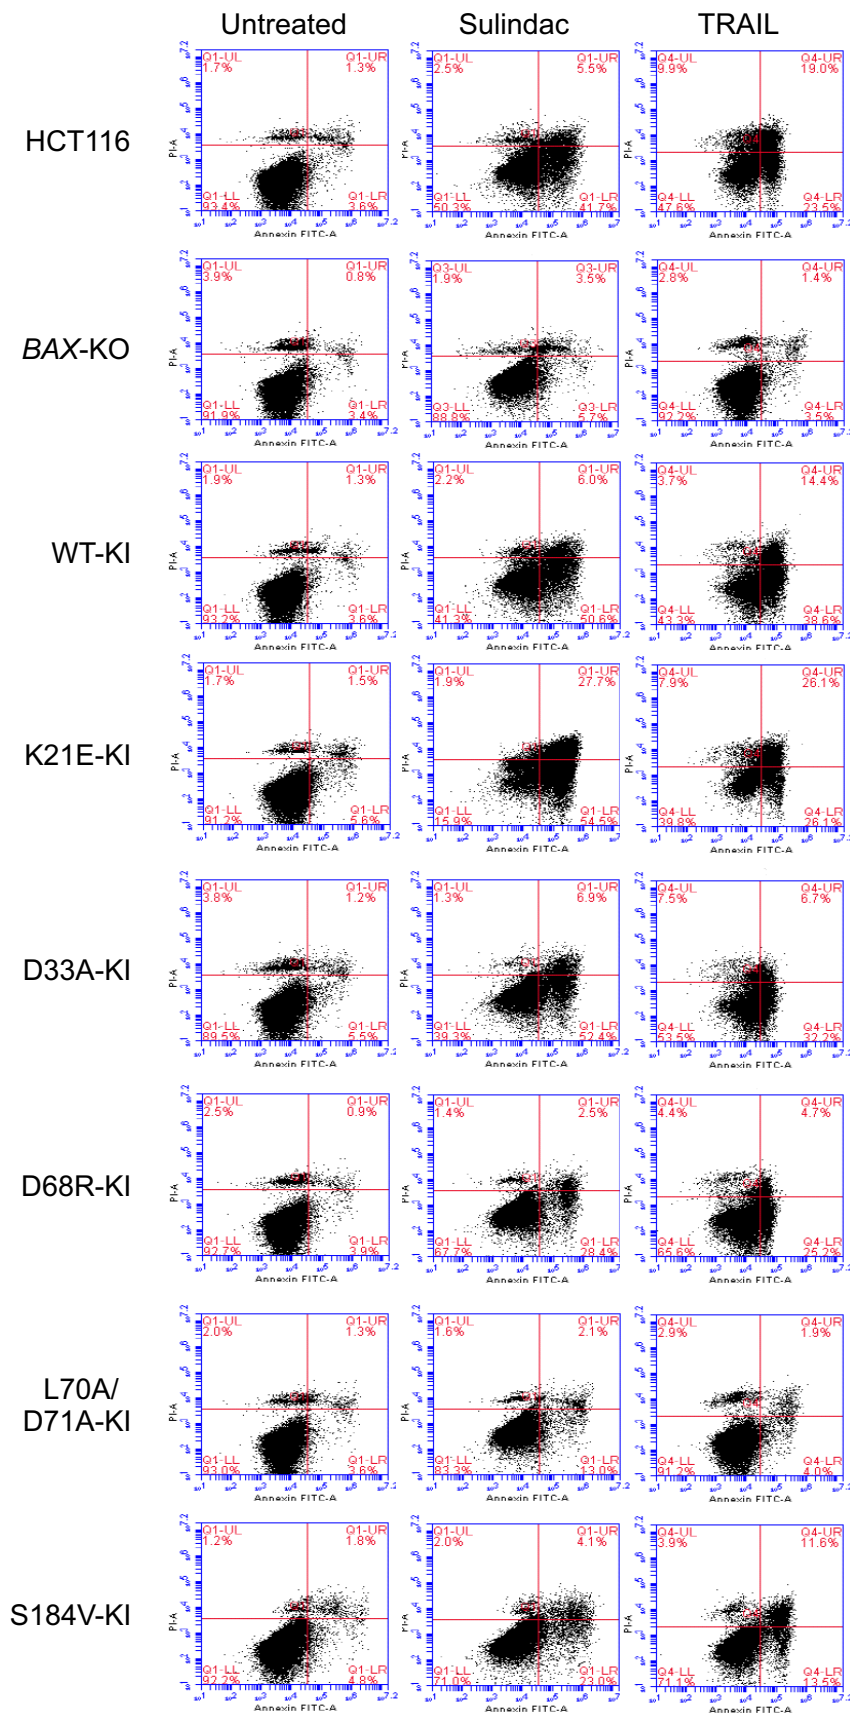

Figure S3

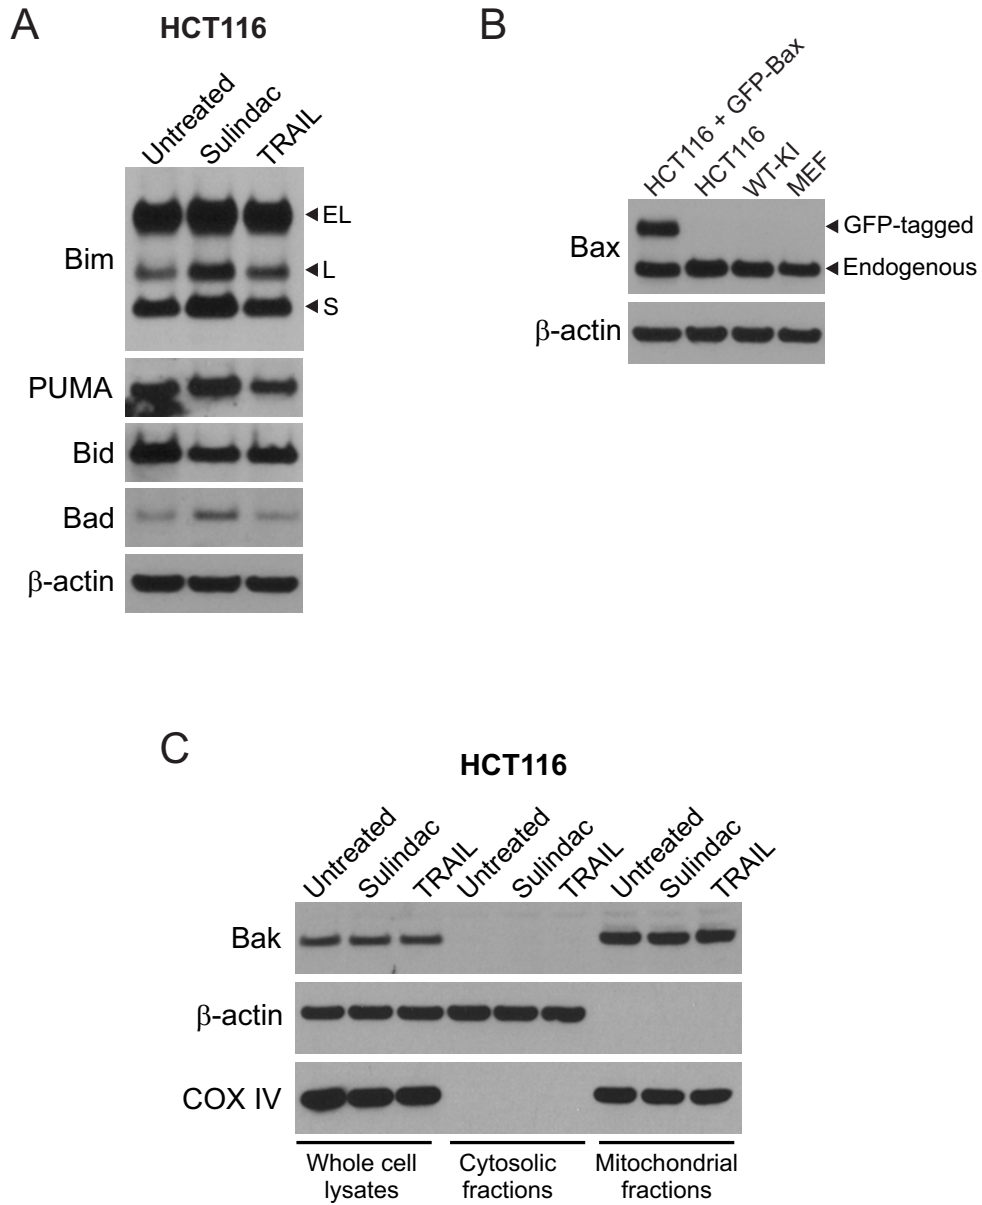

Figure S4

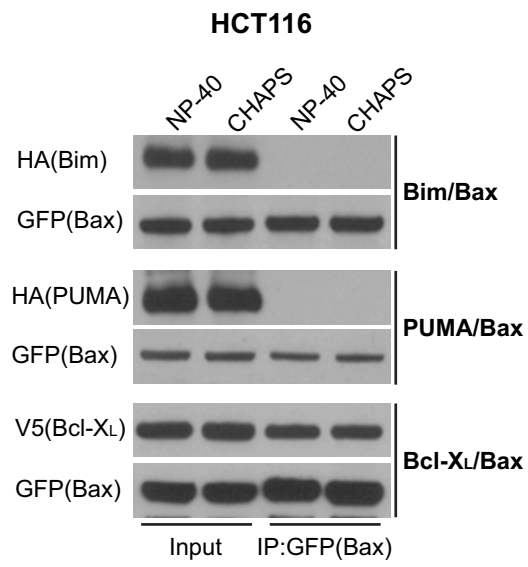

Figure S5

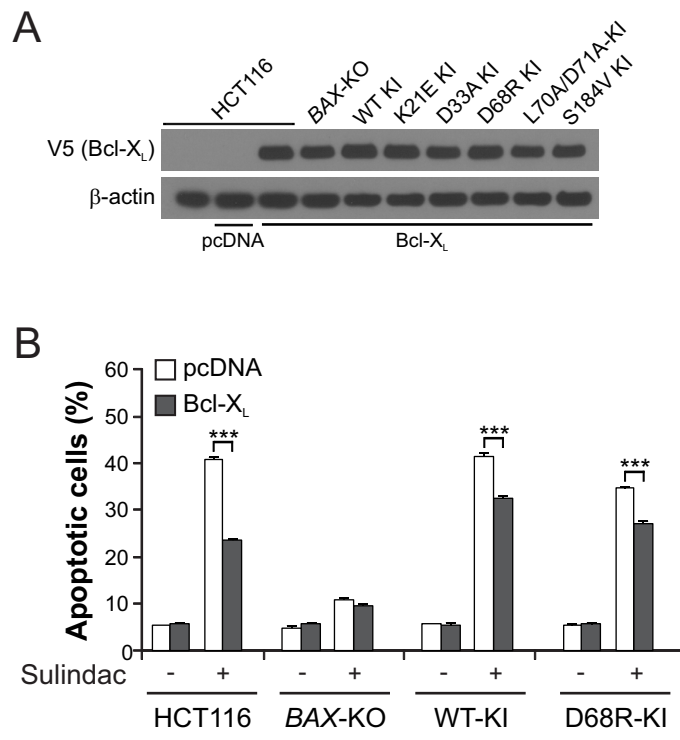

Figure S6

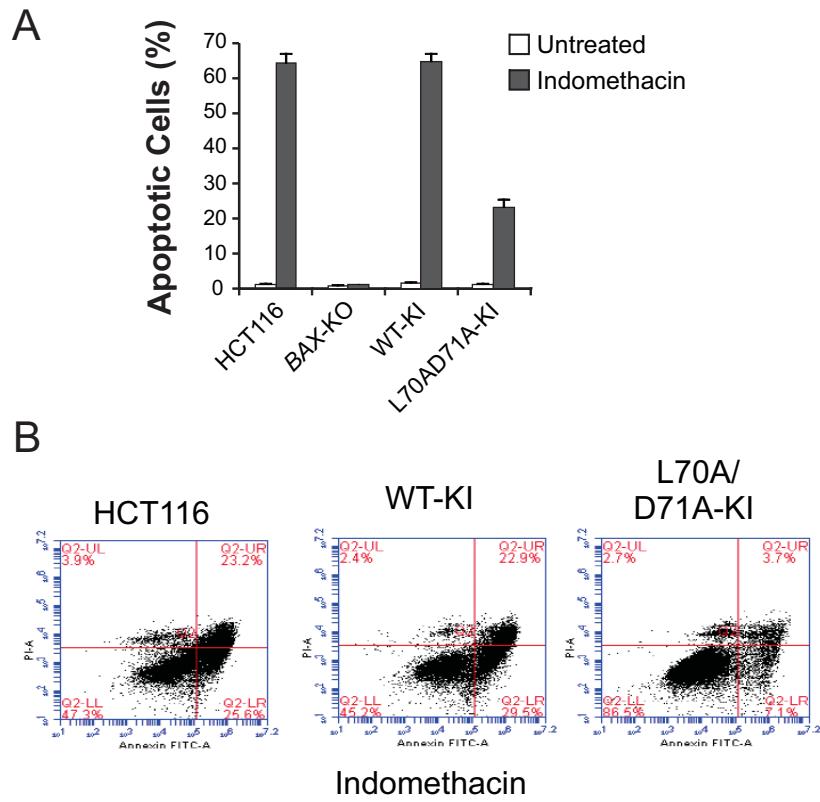



**Table S1. Primers for constructing Bax WT, K21E, D33A, D68R, and L70AD71A knock-in vectors and PCR screen.**

| Purpose                       | Orientation         | Sequence                                            |
|-------------------------------|---------------------|-----------------------------------------------------|
| <i>Vector construction</i>    |                     |                                                     |
| Left homologous arm           | Forward             | 5'-GGG AAA GUg tta tct ctt ggg ctc aca agt tag a-3' |
|                               | Reverse             | 5'-GGA GAC AUt ggg acc cta gca gat aaa gtg ac-3'    |
| Right homologous arm          | Forward             | 5'-GGT CCC Aug aag tcc agg gtc ccc agc t-3'         |
|                               | Reverse             | 5'-GGC ATA GUc agg tcc agt aaa tgc ttg ttg a-3'     |
| <i>PCR screen</i>             |                     |                                                     |
| Left arm                      | Forward             | 5'-tca gca cag att agt ttc tgc ca-3'                |
|                               | <i>Neo</i> reverse  | 5'-ttg tgc cca gtc ata gcc g-3'                     |
| Right arm                     | <i>Neo</i> forward  | 5'-tct tga cga gtt ctt ctt ag-3'                    |
|                               | Reverse             | 5'-cct gac cac tct gct aaa tca c-3'                 |
| <i>PCR screen (after Cre)</i> |                     |                                                     |
| Left arm                      | Forward             | 5'-tca gca cag att agt ttc tgc ca-3'                |
|                               | <i>LoxP</i> reverse | 5'-gac ctc agc gat atc cc tag-3'                    |

Capital letters represent incorporated restriction enzyme site sequences.

**Table S2. Primers for constructing Bax S184V knock-in vector and PCR screen.**

| Purpose                                      | Orientation         | Sequence                                         |
|----------------------------------------------|---------------------|--------------------------------------------------|
| <b><i>Vector construction</i></b>            |                     |                                                  |
| Left homologous arm                          | Forward             | 5'-GGG AAA GU gaga cgg att ctt gct cta ttg tc-3' |
|                                              | Reverse             | 5'-GGA GAC AUc agg gga ct gaga tga acg g-3'      |
| Right homologous arm                         | Forward             | 5'-GGT CCC Aug ccc gca atc ctg cct tct-3'        |
|                                              | Reverse             | 5'-GGC ATA GUc ctg tga ct gaga acc cac atc-3'    |
| <b><i>PCR screen</i></b>                     |                     |                                                  |
| Left arm                                     | Forward             | 5'-gag gtc agg cca aag cct gca c-3'              |
|                                              | <i>Neo</i> reverse  | 5'-ttg tgc cca gtc ata gcc g-3'                  |
| Right arm                                    | <i>Neo</i> forward  | 5'-tct tga cga gtt ctt ctt ag-3'                 |
|                                              | Reverse             | 5'-caa agg tgg ggt ggg aac aga g-3'              |
| <b><i>PCR screen for S184V targeting</i></b> |                     |                                                  |
|                                              | Exon4 forward       | 5'-tgg cag ctg aca tgt ttt ctg ac-3'             |
|                                              | <i>Neo</i> reverse  | 5'-ttg tgc cca gtc ata gcc g-3'                  |
| <b><i>PCR screen (after Cre)</i></b>         |                     |                                                  |
| Left arm                                     | Forward             | 5'-gag gtc agg cca aag cct gca c-3'              |
|                                              | <i>LoxP</i> reverse | 5'-gac ctc agc gat atc cc tag-3'                 |

Capital letters represent incorporated restriction enzyme site sequences.
